# Supplementary material for: A Computational Chemistry Investigation of the Influence of Steric Bulk of Dithiocarbamato-Bound Organic Substituents upon Spodium Bonding in Three Homoleptic Mercury(II) Bis(N,N-dialkyldithiocarbamato) Compounds for Alkyl = Ethyl, Isobutyl, and Cyclohexyl
Source: MDPI journal article supplement (doi:10.3390/inorganics11120468), 2023-12-01
Supplement: s1 [file s1]

# **A computational chemistry investigation of the influence of steric bulk of dithiocarbamato-bound organic substituents upon spodium-bonding in three homoleptic mercury(II) bis(N,N-dialkyldithiocarbamato) compounds for alkyl = ethyl, isobutyl, and cyclohexyl**

Rosa M. Gomila <sup>1</sup>, Edward R.T. Tiekink <sup>1,\*</sup> and Antonio Frontera <sup>1,\*</sup>

<sup>1</sup> Department of Chemistry, Universitat de les Illes Balears, Crta de Valldemossa km 7.5, 07122 Palma de Mallorca, Spain; [rosa.gomila@uib.es](mailto:rosa.gomila@uib.es)

\* Correspondence: [toni.frontera@uib.es](mailto:toni.frontera@uib.es) (A.T.); [edward.tiekink@gmail.com](mailto:edward.tiekink@gmail.com) (E.R.T.T.)

## **\*\*\* Supplementary Materials \*\*\***

**Table S1.** QTAIM parameters (a.u.) for the bond critical points that characterize the spodium bonds.

**Table S2.** Cartesian coordinates for the geometry-optimized monomeric molecules of **1**.

**Table S1.** QTAIM parameters (a.u.) for the bond critical points that characterize the spodium bonds.<sup>a</sup>

| <b>Cmpd</b> | Interaction | $\rho$ | G      | V       | H       | $\nabla^2\rho$ |
|-------------|-------------|--------|--------|---------|---------|----------------|
| <b>1</b>    | Hg...S      | 0.0226 | 0.0148 | -0.0153 | -0.0005 | 0.0571         |
| <b>2</b>    | Hg...S      | 0.0065 | 0.0037 | -0.0028 | 0.0009  | 0.0182         |

<sup>a</sup> Abbreviations: electron-density ( $\rho$ ), total, Lagrangian kinetic and potential energy densities (H, G and V, respectively) and the Laplacian of the electron-density ( $\nabla^2\rho$ ).

**Table S2.** Cartesian coordinates for the geometry-optimized monomeric molecules of **1**.

**1(pseudo-square planar)**

|    |            |            |            |
|----|------------|------------|------------|
| Hg | -3.7114620 | 0.1274194  | 9.1984201  |
| S  | -2.9208632 | -0.7087283 | 11.2855441 |
| S  | -4.7143824 | -2.5632531 | 9.7674468  |
| S  | -4.5991698 | 0.9940679  | 7.1641345  |
| N  | -3.6369418 | -3.0982518 | 12.1307912 |
| C  | -3.7748224 | -2.2316920 | 11.1263666 |
| C  | -2.8056732 | -2.8391372 | 13.2980270 |
| H  | -2.3982669 | -3.8010732 | 13.6198175 |
| H  | -1.9605539 | -2.2198162 | 12.9947176 |
| C  | -3.5726886 | -2.1792311 | 14.4285095 |
| H  | -2.9185472 | -2.0353375 | 15.2909750 |
| H  | -3.9488036 | -1.2038925 | 14.1167487 |
| H  | -4.4194104 | -2.7924230 | 14.7450879 |
| C  | -4.3303468 | -4.3800402 | 12.1211337 |
| H  | -5.2798270 | -4.2448645 | 11.6031834 |
| H  | -4.5438208 | -4.6354026 | 13.1623463 |
| C  | -3.5159128 | -5.4706850 | 11.4534467 |
| H  | -4.0593839 | -6.4172621 | 11.4870925 |
| H  | -3.3343407 | -5.2156232 | 10.4086003 |
| H  | -2.5543134 | -5.6146380 | 11.9520092 |
| S  | -2.3232815 | 2.5565208  | 8.3183298  |
| C  | -3.5035029 | 2.3616223  | 7.1315702  |
| N  | -3.6564879 | 3.2207932  | 6.1228647  |
| C  | -2.7893761 | 4.3834620  | 5.9832762  |
| H  | -2.6963720 | 4.5867433  | 4.9132062  |
| H  | -1.8038494 | 4.1173363  | 6.3654645  |
| C  | -3.3322304 | 5.5937629  | 6.7185002  |
| H  | -2.6713732 | 6.4501943  | 6.5700329  |
| H  | -3.3916835 | 5.3864525  | 7.7877469  |
| H  | -4.3268531 | 5.8675469  | 6.3584253  |
| C  | -4.6769328 | 3.0679080  | 5.0949974  |
| H  | -4.9799122 | 4.0735029  | 4.7918247  |
| H  | -5.5513004 | 2.5906177  | 5.5386764  |

|   |            |           |           |
|---|------------|-----------|-----------|
| C | -4.1839267 | 2.2744586 | 3.8994155 |
| H | -4.9680502 | 2.2091900 | 3.1421098 |
| H | -3.9117803 | 1.2614791 | 4.1992737 |
| H | -3.3113564 | 2.7470735 | 3.4431871 |

### 1(tetrahedral)

|    |           |            |            |
|----|-----------|------------|------------|
| Hg | 3.8297605 | 3.0593076  | 1.3173587  |
| S  | 4.5580917 | 2.7325949  | 3.6889961  |
| S  | 2.6604491 | 0.9158904  | 2.3031776  |
| S  | 4.6169875 | 3.5336568  | -1.0109354 |
| S  | 2.3127145 | 4.9238582  | 0.2444172  |
| N  | 3.3647293 | 0.6714835  | 4.8485649  |
| N  | 3.1339143 | 5.3496088  | -2.2422852 |
| C  | 3.5055158 | 1.3630118  | 3.7199603  |
| C  | 4.0508430 | 1.0401621  | 6.0787927  |
| C  | 5.3981799 | 0.3580453  | 6.2191082  |
| C  | 2.4950922 | -0.4945991 | 4.9282609  |
| C  | 1.0765362 | -0.1276332 | 5.3200771  |
| C  | 3.3253368 | 4.6761333  | -1.1103552 |
| C  | 3.9890557 | 5.1709319  | -3.4074855 |
| C  | 3.4807373 | 4.0857964  | -4.3376924 |
| C  | 2.0437990 | 6.3040897  | -2.3913499 |
| C  | 2.4515809 | 7.7118933  | -2.0017912 |
| H  | 4.1670955 | 2.1243171  | 6.0957425  |
| H  | 3.3916587 | 0.7688714  | 6.9073385  |
| H  | 5.2966603 | -0.7293808 | 6.2061360  |
| H  | 2.9373163 | -1.1753170 | 5.6603310  |
| H  | 2.5059203 | -0.9946918 | 3.9596349  |
| H  | 0.6340400 | 0.5239892  | 4.5653125  |
| H  | 4.0338167 | 6.1336112  | -3.9232263 |
| H  | 4.9967971 | 4.9379100  | -3.0620009 |
| H  | 3.4641139 | 3.1234451  | -3.8244086 |
| H  | 1.2092881 | 5.9650176  | -1.7771564 |
| H  | 1.7255139 | 6.2670235  | -3.4364147 |
| H  | 2.7447897 | 7.7423965  | -0.9515914 |
| H  | 0.4645638 | -1.0285835 | 5.3986989  |

|   |           |           |            |
|---|-----------|-----------|------------|
| H | 1.0492979 | 0.3854304 | 6.2842007  |
| H | 6.0608247 | 0.6554673 | 5.4053072  |
| H | 5.8660893 | 0.6423702 | 7.1639203  |
| H | 2.4721804 | 4.3073195 | -4.6940419 |
| H | 4.1350757 | 4.0001786 | -5.2076379 |
| H | 3.2875936 | 8.0682290 | -2.6082225 |
| H | 1.6140585 | 8.3978102 | -2.1449424 |
